# Supplementary material for: Investigation and Alteration of Organic Acid Synthesis Pathways in the Mammalian Gut Symbiont Bacteroides thetaiotaomicron
Source: PubMed Central journal article supplement (PMC8865466; doi:10.1128/spectrum.02312-21), 2022-02-23
Supplement: spectrum02312-21_supp_1_seq4.pdf [file spectrum02312-21_supp_1_seq4.pdf]

**Supplemental Information: Investigation and alteration of organic acid synthesis  
pathways in the mammalian gut symbiont *Bacteroides thetaiotaomicron***

Nathan T. Porter, and Johan Larsbrink

2 Supplemental Figures

8 Supplemental Tables

**Potential genes involved in formate production**

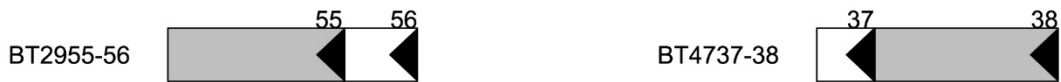

**Potential genes involved in lactate production**

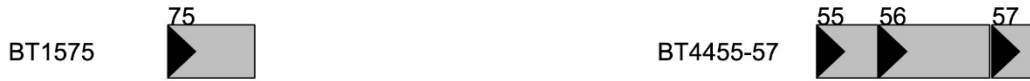

**Potential genes involved in propionate production**

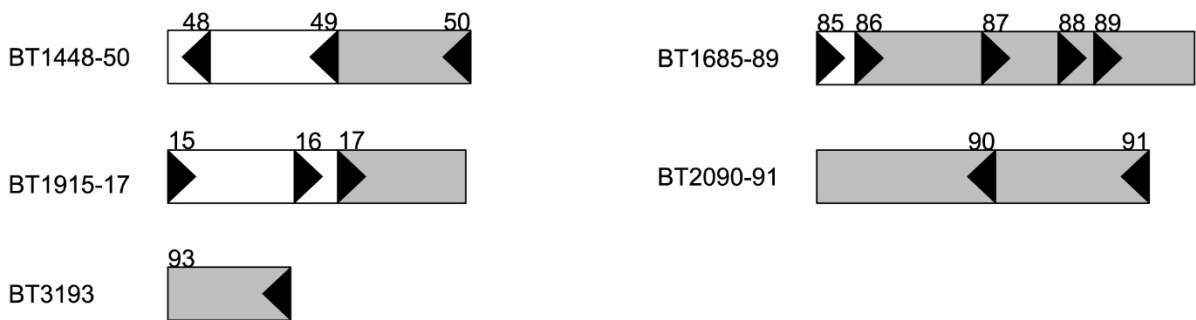

**Potential genes connecting reductive and oxidative metabolism**

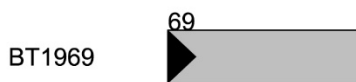

**Potential genes involved in acetate production**

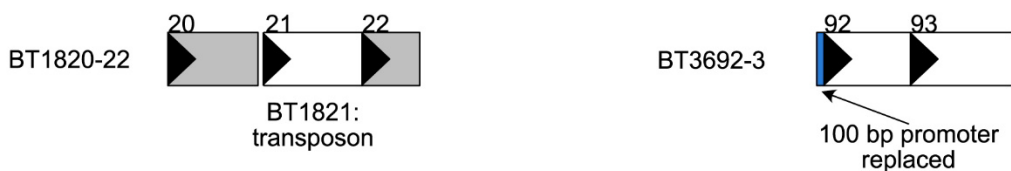

**Figure S1.** Maps of genetic loci investigated in this study, drawn to scale. Loci are organized by metabolic pathway in which they are putatively involved, with corresponding locus tags shown. Gray boxes indicate genes which were deleted in this study. The blue box indicates the BT3692-93 promoter replaced in this study.

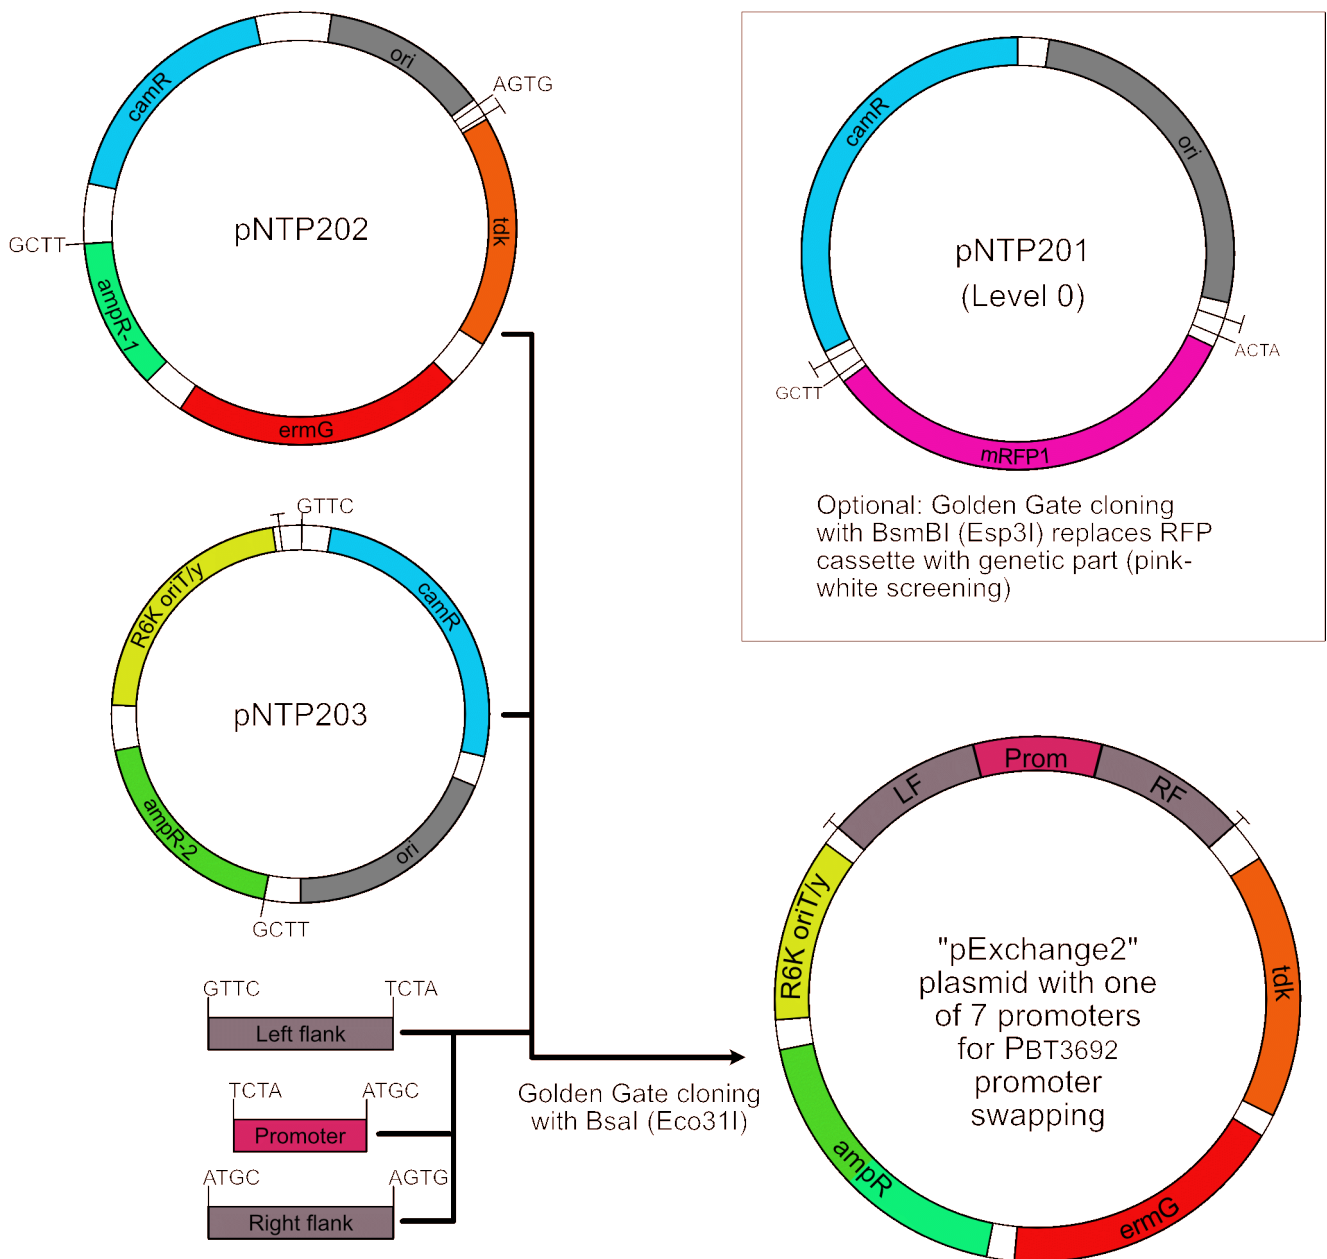

**Figure S2.** New Golden Gate cloning plasmid set for *Bacteroides* non-replicating plasmids based on pExchange-tdk. Optionally, genetic parts can first be incorporated into pNTP201 with Golden Gate cloning and BsmBI. Then the final "pExchange2" vector is assembled from pNTP202, pNTP203, and inserts (PCR amplicons, oligonucleotides, or plasmids) with BsaI-based Golden Gate cloning. 4-nucleotide overhang sequences are shown for each part used here. Flanking termination sequences are also shown with a "T" on pNTP201-3 and the final plasmid.

**Table S1. Organic acid concentrations (mM  $\pm$  standard deviation) and glucose remaining over time for wild-type *B. thetaiotaomicron* (n = 3)**

| Time (hr) | Acetate          | $\alpha$ -keto glutarate | Formate         | Lactate         | Malate          | Propionate      | Pyruvate        | Succinate       | Glucose (%) <sup>a</sup> |
|-----------|------------------|--------------------------|-----------------|-----------------|-----------------|-----------------|-----------------|-----------------|--------------------------|
| 0         | ND <sup>b</sup>  | ND                       | ND              | ND              | ND              | ND              | ND              | ND              | 96.4 $\pm$ 4.4           |
| 6         | 1.81 $\pm$ 0.32  | 0.02 $\pm$ 0.00          | 1.18 $\pm$ 0.18 | ND              | 0.68 $\pm$ 0.01 | 1.01 $\pm$ 0.07 | ND              | 0.90 $\pm$ 0.16 | 90.5 $\pm$ 3.2           |
| 7         | 2.69 $\pm$ 0.48  | 0.03 $\pm$ 0.00          | 1.84 $\pm$ 0.19 | ND              | 0.73 $\pm$ 0.03 | 1.09 $\pm$ 0.05 | ND              | 1.51 $\pm$ 0.26 | 81.1 $\pm$ 4.1           |
| 8         | 4.26 $\pm$ 0.66  | 0.03 $\pm$ 0.00          | 2.46 $\pm$ 0.38 | ND              | 0.83 $\pm$ 0.06 | 1.23 $\pm$ 0.07 | ND              | 2.33 $\pm$ 0.40 | 68.9 $\pm$ 4.7           |
| 12        | 9.77 $\pm$ 0.50  | ND                       | 6.48 $\pm$ 0.17 | 2.69 $\pm$ 0.56 | 1.90 $\pm$ 0.12 | 2.70 $\pm$ 0.10 | 0.20 $\pm$ 0.00 | 5.29 $\pm$ 0.30 | 25.2 $\pm$ 4.5           |
| 24        | 14.07 $\pm$ 0.43 | 0.05 $\pm$ 0.00          | 7.73 $\pm$ 0.07 | 7.87 $\pm$ 0.17 | 2.39 $\pm$ 0.02 | 5.07 $\pm$ 0.07 | 0.11 $\pm$ 0.01 | 6.93 $\pm$ 0.07 | ND                       |
| 30        | 14.20 $\pm$ 0.42 | 0.04 $\pm$ 0.00          | 7.64 $\pm$ 0.09 | 7.76 $\pm$ 0.10 | 2.23 $\pm$ 0.02 | 5.34 $\pm$ 0.03 | 0.08 $\pm$ 0.00 | 7.00 $\pm$ 0.08 | ND                       |
| 36        | 14.27 $\pm$ 0.12 | 0.04 $\pm$ 0.00          | 7.61 $\pm$ 0.03 | 7.59 $\pm$ 0.10 | 2.12 $\pm$ 0.01 | 5.82 $\pm$ 0.05 | 0.07 $\pm$ 0.00 | 7.22 $\pm$ 0.13 | ND                       |
| 48        | 14.85 $\pm$ 0.62 | 0.03 $\pm$ 0.03          | 7.17 $\pm$ 0.44 | 6.79 $\pm$ 0.51 | 2.03 $\pm$ 0.20 | 6.21 $\pm$ 0.16 | 0.23 $\pm$ 0.30 | 7.56 $\pm$ 0.46 | ND                       |
| 72        | 15.25 $\pm$ 0.54 | 0.04 $\pm$ 0.00          | 7.75 $\pm$ 0.18 | 7.34 $\pm$ 0.14 | 1.57 $\pm$ 0.02 | 6.16 $\pm$ 0.25 | 0.02 $\pm$ 0.00 | 7.99 $\pm$ 0.20 | ND                       |

<sup>a</sup> Glucose calculated as percent remaining glucose relative to minimal medium with glucose

<sup>b</sup> ND: Not detected; butyrate and fumarate were not detected in any samples

**Table S2. Genes putatively involved in the metabolic pathways outlined in Figure 2.**

| Gene ID | Derived predicted annotation                                                              | GenBank Accession | Uniprot Entry | Size (aa) | TH <sup>a</sup> | Locus         | TSS <sup>b</sup> | Putative source node | Putative destination node | RPKM EEP <sup>c</sup> | RPKM MEP <sup>d</sup> | RPKM Stat <sup>e</sup> | Reference |
|---------|-------------------------------------------------------------------------------------------|-------------------|---------------|-----------|-----------------|---------------|------------------|----------------------|---------------------------|-----------------------|-----------------------|------------------------|-----------|
| BT0309  | Dihydrolipoamide dehydrogenase (E3 component, 2-oxoglutarate dehydrogenase complex)       | NP 809222         | Q8AB03        | 447       |                 | BT0309-BT0313 | Yes              | 2-oxo glutarate      | Succinyl-CoA              | 1.92                  | 3.92                  | 59.63                  |           |
| BT0310  | Lipoate-protein ligase A                                                                  | NP 809223         | Q8AB02        | 239       |                 | BT0309-BT0313 |                  | 2-oxo glutarate      | Succinyl-CoA              | 1.25                  | 2.69                  | 23.65                  |           |
| BT0311  | Dihydrolipoamide succinyltransferase (E2 component, 2-oxoglutarate dehydrogenase complex) | NP 809224         | Q8AB01        | 456       |                 | BT0309-BT0313 | Yes              | 2-oxo glutarate      | Succinyl-CoA              | 2.19                  | 8.57                  | 95.24                  |           |
| BT0312  | 2-oxoglutarate decarboxylase (E1 component, 2-oxoglutarate dehydrogenase complex)         | NP 809225         | Q8AB00        | 678       |                 | BT0309-BT0313 |                  | 2-oxo glutarate      | Succinyl-CoA              | 2.74                  | 6.21                  | 81.91                  |           |
| BT0313  | Flavodoxin associated with 2-oxoglutarate dehydrogenase complex                           | NP 809226         | Q8AAZ9        | 171       |                 | BT0309-BT0313 |                  |                      |                           | 2.74                  | 10.65                 | 155.37                 |           |
| BT0329  | 2-oxoglutarate/2-oxoacid ferredoxin oxidoreductase subunit gamma                          | NP 809242         | Q8AAY3        | 180       |                 | BT0329-BT0333 |                  | 2-oxo glutarate      | Succinyl-CoA              | 53.59                 | 68.99                 | 37.83                  |           |
| BT0330  | 2-oxoglutarate/2-oxoacid ferredoxin oxidoreductase subunit beta                           | NP 809243         | Q8AAY2        | 235       |                 | BT0329-BT0334 | Yes              | 2-oxo glutarate      | Succinyl-CoA              | 40.46                 | 46.53                 | 26.05                  |           |
| BT0331  | 2-oxoglutarate/2-oxoacid ferredoxin oxidoreductase subunit alpha                          | NP 809244         | Q8AAY1        | 295       |                 | BT0329-BT0334 |                  | 2-oxo glutarate      | Succinyl-CoA              | 43.77                 | 46.77                 | 24.72                  |           |
| BT0332  | 2-oxoglutarate/2-oxoacid ferredoxin oxidoreductase subunit alpha                          | NP 809245         |               | 59        |                 | BT0329-BT0334 |                  | 2-oxo glutarate      | Succinyl-CoA              | 51.56                 | 57.49                 | 29.21                  |           |
| BT0333  | 2-oxoglutarate/2-oxoacid ferredoxin oxidoreductase subunit delta                          | NP 809246         | Q8AAX9        | 75        |                 | BT0329-BT0334 | BT0334           | 2-oxo glutarate      | Succinyl-CoA              | 65.06                 | 79.51                 | 37.66                  |           |
| BT0644  | Pyruvate phosphate dikinase                                                               | NP 809557         | Q8AA21        | 906       |                 |               | Yes              | Pyruvate             | PEP                       | 11.98                 | 7.82                  | 15.96                  |           |
| BT0787  | Succinyl-CoA synthetase alpha chain                                                       | NP 809700         | Q8A9M8        | 286       |                 | BT0787-BT0788 |                  | Succinate            | Succinyl-CoA              | 0.20                  | 0.59                  | 4.07                   |           |
| BT0788  | Succinyl-CoA synthetase beta chain                                                        | NP 809701         | Q8A9M7        | 376       |                 | BT0787-BT0788 | Yes              | Succinate            | Succinyl-CoA              | 0.49                  | 0.62                  | 5.11                   |           |
| BT1196  | Pyruvate carboxylase                                                                      | NP 810109         | Q8A8H1        | 591       |                 |               | Yes              | Pyruvate             | Oxaloacetate              | 1.28                  | 3.59                  | 46.60                  |           |
| BT1448  | Biotin-dependent carboxylase, biotin carboxyl carrier protein                             | NP 810361         | Q8A7S6        | 174       |                 | BT1448-BT1450 |                  |                      |                           | 0.57                  | 0.83                  | 13.84                  |           |

|        |                                                                          |           |        |      |    |  |               |     |                    |                   |       |       |       |                |
|--------|--------------------------------------------------------------------------|-----------|--------|------|----|--|---------------|-----|--------------------|-------------------|-------|-------|-------|----------------|
| BT1449 | Biotin-dependent carboxylase, biotin carboxylase subunit                 | NP 810362 | Q8A7S5 | 503  |    |  | BT1448-BT1450 |     |                    |                   | 0.59  | 0.63  | 13.67 |                |
| BT1450 | Biotin-dependent carboxylase, carboxytransferase subunit                 | NP 810363 | Q8A7S4 | 514  |    |  | BT1448-BT1450 | Yes |                    |                   | 0.52  | 0.59  | 13.28 | This work      |
| BT1575 | D-lactate dehydrogenase                                                  | NP 810488 | Q8A7E9 | 333  |    |  |               |     | Pyruvate           | Lactate           | 2.87  | 4.99  | 14.15 | This work      |
| BT1685 | Methylmalonyl-CoA epimerase                                              | NP 810598 | Q8A740 | 134  |    |  | BT1685-BT1689 | Yes | Methyl malonyl-CoA | Methylmalonyl-CoA | 89.81 | 72.00 | 27.45 |                |
| BT1686 | Methylmalonyl-CoA decarboxylase (alpha subunit)                          | NP 810599 | Q8A739 | 517  |    |  | BT1685-BT1689 |     | Methyl malonyl-CoA | Propionyl-CoA     | 96.91 | 65.63 | 23.72 | This work, (1) |
| BT1687 | Methylmalonyl-CoA decarboxylase (membrane associated subunit)            | NP 810600 | Q8A738 | 306  | 1  |  | BT1685-BT1689 |     | Methyl malonyl-CoA | Propionyl-CoA     | 87.26 | 53.66 | 14.83 | This work, (1) |
| BT1688 | Methylmalonyl-CoA decarboxylase (biotin carboxylase component)           | NP 810601 | Q8A737 | 144  |    |  | BT1685-BT1689 |     | Methyl malonyl-CoA | Propionyl-CoA     | 98.86 | 65.01 | 18.77 | This work, (1) |
| BT1689 | Methylmalonyl-CoA decarboxylase (beta subunit)                           | NP 810602 | Q8A736 | 386  | 10 |  | BT1685-BT1689 |     | Methyl malonyl-CoA | Propionyl-CoA     | 77.89 | 62.45 | 18.84 | This work, (1) |
| BT1696 | Oxaloacetate decarboxylase, Na <sup>+</sup> transporting (beta subunit)  | NP 810609 | Q8A729 | 411  | 9  |  | BT1696-BT1698 |     | Oxalo acetate      | Pyruvate          | 8.78  | 7.22  | 5.11  |                |
| BT1697 | Oxaloacetate decarboxylase, Na <sup>+</sup> transporting (alpha subunit) | NP 810610 | Q8A728 | 609  |    |  | BT1696-BT1698 |     | Oxalo acetate      | Pyruvate          | 7.89  | 8.79  | 6.35  |                |
| BT1698 | Oxaloacetate decarboxylase, Na <sup>+</sup> transporting (gamma subunit) | NP 810611 | Q8A727 | 86   | 2  |  | BT1696-BT1698 | Yes | Oxalo acetate      | Pyruvate          | 13.32 | 11.87 | 14.88 |                |
| BT1747 | Pyruvate ferredoxin oxidoreductase (PFOR)                                | NP 810660 | Q8A6X8 | 1185 |    |  |               |     | Pyruvate           | Acetyl-CoA        | 74.55 | 99.46 | 49.95 | (2)            |
| BT1820 | Pyruvate oxidase (split by transposable element BT1821)                  | NP 810733 | Q8A6Q6 | 362  |    |  | BT1820-BT1822 | Yes | Pyruvate           | Acetate           | 0.89  | 4.10  | 47.66 | This work      |
| BT1822 | Pyruvate oxidase (split by transposable element BT1821)                  | NP 810735 | Q8A6Q5 | 228  |    |  | BT1820-BT1822 |     | Pyruvate           | Acetate           | 0.24  | 1.01  | 10.60 | This work      |
| BT1915 | Biotin-dependent carboxylase, biotin carboxylase subunit                 | NP 810828 | Q8A6G9 | 503  |    |  | BT1915-BT1917 | Yes | Pyruvate           | Oxalo acetate     | 73.37 | 57.03 | 40.94 |                |
| BT1916 | Biotin-dependent carboxylase, biotin carboxyl carrier protein            | NP 810829 | Q8A6G8 | 169  |    |  | BT1915-BT1917 |     |                    |                   | 81.37 | 63.85 | 51.74 |                |
| BT1917 | Biotin-dependent carboxylase, carboxytransferase subunit                 | NP 810830 | Q8A6G7 | 511  |    |  | BT1915-BT1917 |     | Succinate          | Propionate        | 94.73 | 73.61 | 62.12 | This work      |
| BT1969 | Malate dehydrogenase (NADP-dependent)                                    | NP 810882 | Q8A6B5 | 763  |    |  |               | Yes | Malate             | Pyruvate          | 14.54 | 19.15 | 19.05 | This work      |

|        |                                                                              |           |        |     |   |               |        |                  |                  |        |        |        |                |
|--------|------------------------------------------------------------------------------|-----------|--------|-----|---|---------------|--------|------------------|------------------|--------|--------|--------|----------------|
| BT1972 | Phosphoenolpyruvate synthase                                                 | NP 810885 | Q8A6B3 | 990 |   |               | Yes    | Pyruvate         | PEP              | 5.27   | 4.02   | 3.25   |                |
| BT2070 | Citrate synthase                                                             | NP 810983 | Q8A616 | 447 |   | BT2070-BT2072 |        | Acetyl-CoA       | Citrate          | 8.70   | 15.50  | 70.24  |                |
| BT2071 | Isocitrate dehydrogenase                                                     | NP 810984 | Q8A615 | 396 |   | BT2070-BT2072 |        | Isocitrate       | 2-oxo glutarate  | 5.89   | 12.45  | 63.38  |                |
| BT2072 | Aconitase                                                                    | NP 810985 | Q8A614 | 747 |   | BT2070-BT2072 |        | Citrate          | Isocitrate       | 5.54   | 11.85  | 54.16  |                |
| BT2090 | Methylmalonyl-CoA mutase (large subunit)                                     | NP 811003 | Q8A5Z6 | 715 |   | BT2090-BT2091 |        | Succinate        | Propionate       | 17.89  | 24.16  | 27.71  | This work      |
| BT2091 | Methylmalonyl-CoA mutase (small subunit)                                     | NP 811004 | Q8A5Z5 | 633 |   | BT2090-BT2091 | Yes    | Succinate        | Propionate       | 17.75  | 22.69  | 21.46  | This work      |
| BT2256 | Fumarase, class I, homodimeric                                               | NP 811169 | Q8A5I3 | 544 |   |               | Yes    | Malate           | Fumarate         | 94.12  | 140.72 | 79.26  | (3)            |
| BT2510 | Malate dehydrogenase (NAD-dependent)                                         | NP 811423 | Q8A4T7 | 333 |   |               | Yes    | Oxaloacetate     | Malate           | 24.30  | 56.09  | 67.76  |                |
| BT2790 | Phosphoenolpyruvate carboxykinase                                            | NP 811702 | Q8A414 | 535 |   |               | Yes    | PEP              | Oxaloacetate     | 523.59 | 766.60 | 316.40 |                |
| BT2836 | 2-oxoglutarate/2-oxoacid ferredoxin oxidoreductase subunit alpha             | NP 811748 | Q8A3W8 | 616 |   | BT2836-BT2837 | Yes    | 2-oxo glutarate  | Succinyl-CoA     | 24.61  | 24.81  | 9.56   |                |
| BT2837 | 2-oxoglutarate/2-oxoacid ferredoxin oxidoreductase subunit beta              | NP 811749 | Q8A3W7 | 336 |   | BT2836-BT2837 |        | 2-oxo glutarate  | Succinyl-CoA     | 23.39  | 22.28  | 9.49   |                |
| BT2841 | Pyruvate kinase                                                              | NP 811753 | Q8A3W3 | 485 |   |               |        | PEP              | Pyruvate         | 70.72  | 47.98  | 19.38  |                |
| BT2955 | Formate acetyltransferase 2 [Pyruvate formate-lyase]                         | NP 811867 | Q8A3J9 | 714 |   | BT2955-BT2956 |        | Pyruvate         | Formate          | 0.04   | 0.07   | 0.09   | This work, (2) |
| BT2956 | Pyruvate formate lyase activating enzyme                                     | NP 811868 | Q8A3J8 | 299 |   | BT2955-BT2956 |        | Pyruvate         | Formate          | 0.05   | 0.00   | 0.09   |                |
| BT3053 | Fumarate reductase (cytochrome b subunit)                                    | NP 811965 | Q8A3A1 | 234 | 5 | BT3053-BT3055 | Yes    | Fumarate         | Succinate        | 165.87 | 220.34 | 63.42  | (4)            |
| BT3054 | Fumarate reductase (flavoprotein subunit)                                    | NP 811966 | Q8A3A0 | 659 |   | BT3053-BT3055 |        | Fumarate         | Succinate        | 142.68 | 198.90 | 58.45  | (4)            |
| BT3055 | Fumarate reductase (iron sulfur protein subunit)                             | NP 811967 | Q8A399 | 251 |   | BT3053-BT3055 |        | Fumarate         | Succinate        | 116.09 | 157.01 | 49.08  | (4)            |
| BT3186 | Dihydrolipoamide dehydrogenase (E3 subunit, 2-oxoacid dehydrogenase complex) | NP 812098 | Q8A2W9 | 447 |   |               | BT3185 |                  |                  | 5.04   | 4.76   | 2.05   |                |
| BT3193 | Coenzyme A transferase                                                       | NP 812105 | Q8A2W2 | 499 |   |               |        | Propionyl-CoA    | Succinyl-CoA     | 28.38  | 21.45  | 5.09   | This work      |
| BT3692 | Phosphate acetyltransferase                                                  | NP 812603 | Q8A1G9 | 339 |   | BT3692-BT3693 | Yes    | Acetyl-CoA       | Acetyl phosphate | 33.06  | 38.00  | 7.96   | This work      |
| BT3693 | Acetate kinase                                                               | NP 812604 | Q8A1G8 | 399 |   | BT3692-BT3693 |        | Acetyl phosphate | Acetate          | 28.12  | 32.05  | 8.46   | This work      |
| BT3755 | Acetyl-coenzyme A synthetase                                                 | NP 812666 | Q8A1B1 | 551 |   |               | BT3757 | Acetate          | Acetyl-CoA       | 17.51  | 11.31  | 13.59  |                |
| BT3911 | Malate dehydrogenase (NAD-dependent)                                         | NP 812822 | Q8A0W0 | 313 |   |               | Yes    | Oxaloacetate     | Malate           | 200.37 | 543.45 | 473.80 |                |

|        |                                                              |           |        |     |  |               |     |          |          |        |        |       |                |
|--------|--------------------------------------------------------------|-----------|--------|-----|--|---------------|-----|----------|----------|--------|--------|-------|----------------|
| BT4455 | L-lactate dehydrogenase, Fe-S oxidoreductase subunit         | NP 813366 | Q89ZC2 | 246 |  | BT4455-BT4457 | Yes | Lactate  | Pyruvate | 22.41  | 31.12  | 63.69 | This work      |
| BT4456 | L-lactate dehydrogenase, Iron-sulfur cluster-binding subunit | NP 813367 | Q89ZC1 | 461 |  | BT4455-BT4457 |     | Lactate  | Pyruvate | 20.53  | 25.60  | 61.81 | This work      |
| BT4457 | L-lactate dehydrogenase, hypothetical protein subunit        | NP 813368 | Q89ZC0 | 193 |  | BT4455-BT4457 |     | Lactate  | Pyruvate | 15.77  | 21.79  | 60.98 | This work      |
| BT4737 | Pyruvate formate lyase activating enzyme                     | NP 813648 | Q89YJ4 | 242 |  | BT4737-BT4738 |     | Pyruvate | Formate  | 39.20  | 33.02  | 3.22  |                |
| BT4738 | Formate acetyltransferase [Pyruvate formate-lyase]           | NP 813649 | Q89YJ3 | 742 |  | BT4737-BT4738 | Yes | Pyruvate | Formate  | 186.40 | 117.01 | 16.28 | This work, (2) |

<sup>a</sup> TH: Predicted transmembrane helices (IMG)

<sup>b</sup> TSS: 5' transcriptional start site (from Theta-Base, (5))

<sup>c</sup> RPKM EEP: Normalized gene expression of *Bt* in early exponential phase (Theta-Base, (5))

<sup>d</sup> RPKM MEP: Normalized gene expression of *Bt* in mid exponential phase (Theta-Base, (5))

<sup>e</sup> RPKM Stat: Normalized gene expression of *Bt* in stationary phase (Theta-Base, (5))



**Table S3. Growth summary data for strains grown in rich medium (TYG) and minimal medium (MMG)**

| Strain                                                                    | TYG Max OD600 <sup>a</sup> | TYG Specific Rate <sup>b</sup> | MMG Max OD600 | MMG Specific Rate |
|---------------------------------------------------------------------------|----------------------------|--------------------------------|---------------|-------------------|
| <b>Growth curve summary data from Figures 3-7; n = 3 except WT, n = 6</b> |                            |                                |               |                   |
| WT                                                                        | 1.36 ± 0.06                | 0.1647 ± 0.0110                | 1.09 ± 0.11   | 0.0813 ± 0.0253   |
| ΔBT2955                                                                   | 1.32 ± 0.09                | 0.1712 ± 0.0065                | 1.00 ± 0.03   | 0.0803 ± 0.0290   |
| ΔBT4738                                                                   | 1.26 ± 0.09                | 0.1619 ± 0.0075                | 0.98 ± 0.07   | 0.0668 ± 0.0243   |
| ΔBT2955/4738                                                              | 1.28 ± 0.09                | 0.1608 ± 0.0120                | 0.99 ± 0.08   | 0.0669 ± 0.0248   |
| ΔBT1575                                                                   | 1.42 ± 0.04                | 0.1644 ± 0.0213                | 1.15 ± 0.11   | 0.0812 ± 0.0348   |
| ΔBT4455                                                                   | 1.42 ± 0.03                | 0.1593 ± 0.0181                | 1.15 ± 0.11   | 0.0802 ± 0.0319   |
| ΔBT1575/4455-7                                                            | 1.43 ± 0.02                | 0.1632 ± 0.0155                | 1.17 ± 0.11   | 0.0861 ± 0.0357   |
| ΔBT1450                                                                   | 1.34 ± 0.08                | 0.1672 ± 0.0091                | 0.99 ± 0.05   | 0.0758 ± 0.0232   |
| ΔBT1686-9                                                                 | 1.30 ± 0.04                | 0.1286 ± 0.0093                | 0.96 ± 0.05   | 0.0797 ± 0.0184   |
| ΔBT1917                                                                   | 1.35 ± 0.05                | 0.1816 ± 0.0166                | 1.02 ± 0.03   | 0.0814 ± 0.0226   |
| ΔBT2090-1                                                                 | 1.30 ± 0.06                | 0.1566 ± 0.0217                | 1.04 ± 0.13   | 0.0861 ± 0.0410   |
| ΔBT3193                                                                   | 1.26 ± 0.07                | 0.1410 ± 0.0116                | 0.33 ± 0.19   | 0.0059 ± 0.0040   |
| ΔBT1969                                                                   | 1.43 ± 0.02                | 0.1534 ± 0.0075                | 1.12 ± 0.14   | 0.0750 ± 0.0309   |
| ΔBT1820                                                                   | 1.42 ± 0.02                | 0.1538 ± 0.0063                | 1.15 ± 0.11   | 0.0814 ± 0.0285   |
| ΔBT1822                                                                   | 1.39 ± 0.05                | 0.1502 ± 0.0200                | 1.20 ± 0.09   | 0.0846 ± 0.0275   |
| ΔBT1820/1822                                                              | 1.41 ± 0.02                | 0.1459 ± 0.0168                | 1.15 ± 0.07   | 0.0793 ± 0.0273   |
| <b>Growth curve summary data from Figure 8; n = 3</b>                     |                            |                                |               |                   |
| WT                                                                        | 1.45 ± 0.02                | 0.1463 ± 0.0044                | 0.90 ± 0.05   | 0.0406 ± 0.0049   |
| P_BfP2E3                                                                  | 1.29 ± 0.02                | 0.0874 ± 0.0085                | 0.90 ± 0.08   | 0.0296 ± 0.0066   |
| P_BfP5E4                                                                  | 1.40 ± 0.02                | 0.1354 ± 0.0069                | 0.92 ± 0.03   | 0.0402 ± 0.0029   |

<sup>a</sup> OD600 = optical density at 600 nm

<sup>b</sup> Specific rate: (Maximum - Minimum OD600) / time

**Table S4. Organic acid concentrations (mM  $\pm$  standard deviation) at 48 hours for the wild-type (WT), various mutant strains and their complements (n = 3)**

| Strain                   | Acetate          | Formate          | Lactate         | Malate          | Propionate      | Succinate        |
|--------------------------|------------------|------------------|-----------------|-----------------|-----------------|------------------|
| WT                       | 16.48 $\pm$ 0.35 | 7.55 $\pm$ 0.28  | 2.09 $\pm$ 0.25 | ND <sup>a</sup> | 7.74 $\pm$ 0.64 | 9.47 $\pm$ 0.64  |
| $\Delta$ BT1686-9        | 17.60 $\pm$ 0.28 | 8.75 $\pm$ 1.26  | 2.26 $\pm$ 0.32 | 1.52 $\pm$ 0.08 | ND              | 17.33 $\pm$ 0.42 |
| Comp <sup>b</sup> 1685-9 | 16.67 $\pm$ 0.19 | 8.08 $\pm$ 0.43  | 2.51 $\pm$ 0.63 | ND              | 8.70 $\pm$ 0.26 | 8.95 $\pm$ 0.77  |
| $\Delta$ BT2090-1        | 16.82 $\pm$ 0.27 | 10.13 $\pm$ 0.85 | 2.62 $\pm$ 0.63 | 1.56 $\pm$ 0.06 | ND              | 17.49 $\pm$ 0.32 |
| Comp 2090-1              | 17.09 $\pm$ 0.07 | 7.25 $\pm$ 1.48  | 1.47 $\pm$ 0.21 | ND              | 8.52 $\pm$ 1.58 | 8.61 $\pm$ 1.90  |
| $\Delta$ BT4738          | 15.04 $\pm$ 0.07 | 1.93 $\pm$ 0.66  | 1.16 $\pm$ 0.06 | ND              | 7.77 $\pm$ 0.92 | 12.50 $\pm$ 0.16 |
| Comp 4738                | 16.00 $\pm$ 0.51 | 6.45 $\pm$ 1.25  | 1.73 $\pm$ 0.37 | 0.55 $\pm$ 0.95 | 9.27 $\pm$ 1.26 | 9.93 $\pm$ 1.66  |

<sup>a</sup> Not detected.  $\alpha$ -ketoglutarate or pyruvate were also not detected in any strain or sample.

<sup>b</sup> Comp: Mutant strain from the row above complemented with the listed genes

**Table S5. Organic acid concentrations (mM  $\pm$  standard deviation) at 48 hours for the wild-type (WT) and  $\Delta$ BT1969 strains (n = 6)**

| <b>Strain</b>   | <b>Acetate</b>   | <b>Formate</b>  | <b>Lactate</b>  | <b>Malate</b>   | <b>Propionate</b> | <b>Succinate</b> |
|-----------------|------------------|-----------------|-----------------|-----------------|-------------------|------------------|
| WT              | 14.62 $\pm$ 0.42 | 7.72 $\pm$ 0.75 | 1.83 $\pm$ 0.13 | ND <sup>a</sup> | 8.76 $\pm$ 0.60   | 6.11 $\pm$ 0.48  |
| $\Delta$ BT1969 | 13.03 $\pm$ 0.25 | 9.22 $\pm$ 1.14 | 1.40 $\pm$ 0.11 | 1.39 $\pm$ 0.68 | 8.30 $\pm$ 0.57   | 8.43 $\pm$ 0.56  |

<sup>a</sup> Not detected.  $\alpha$ -ketoglutarate or pyruvate were also not detected in any strain or sample.

**Table S6. Organic acid concentrations (mM  $\pm$  standard deviation) at 48 hours for the wild-type (WT) and the promoter replacement strains (n = 3)**

| <b>Strain</b> | <b>Acetate</b>   | <b>Formate</b>    | <b>Lactate</b>  | <b>Malate</b>   | <b>Propionate</b> | <b>Succinate</b> |
|---------------|------------------|-------------------|-----------------|-----------------|-------------------|------------------|
| WT            | 17.43 $\pm$ 0.17 | 11.60 $\pm$ 0.52  | 2.26 $\pm$ 0.05 | 1.60 $\pm$ 0.01 | 10.92 $\pm$ 0.37  | 6.84 $\pm$ 0.22  |
| P_BfP2E3      | 17.13 $\pm$ 0.20 | 16.76 $\pm$ 14.10 | 3.13 $\pm$ 1.22 | 0.64 $\pm$ 1.11 | 9.46 $\pm$ 0.26   | 6.79 $\pm$ 1.01  |
| P_BfP5E4      | 17.12 $\pm$ 0.25 | 11.26 $\pm$ 0.29  | 2.44 $\pm$ 0.17 | 1.54 $\pm$ 0.02 | 9.89 $\pm$ 0.10   | 7.23 $\pm$ 0.16  |

Not detected for any strain or sample:  $\alpha$ -ketoglutarate or pyruvate

**Table S7. Strains and plasmids used in this study.**

| Name                                         | Genotype                                              | Ref. | Notes                                                                                         |
|----------------------------------------------|-------------------------------------------------------|------|-----------------------------------------------------------------------------------------------|
| <b>Strains</b>                               |                                                       |      |                                                                                               |
| WT <i>Bt</i>                                 | <i>tdk</i> - (ΔBT2275)                                | (6)  | Parent strain of other <i>Bt</i> strains; derived from ATCC 29148/VPI-5482                    |
| ΔBT2955                                      | <i>tdk</i> - ΔBT2955                                  |      |                                                                                               |
| ΔBT4738                                      | <i>tdk</i> - ΔBT4738                                  |      |                                                                                               |
| ΔBT2955/4738                                 | <i>tdk</i> - ΔBT2955/4738                             |      |                                                                                               |
| ΔBT1575                                      | <i>tdk</i> - ΔBT1575                                  |      |                                                                                               |
| ΔBT4455-7                                    | <i>tdk</i> - ΔBT4455-7                                |      |                                                                                               |
| ΔBT1575/4455-7                               | <i>tdk</i> - ΔBT1575/4455-7                           |      |                                                                                               |
| ΔBT1450                                      | <i>tdk</i> - ΔBT1450                                  |      |                                                                                               |
| ΔBT1686-9                                    | <i>tdk</i> - ΔBT1686-9                                | (1)  |                                                                                               |
| ΔBT1917                                      | <i>tdk</i> - ΔBT1917                                  |      |                                                                                               |
| ΔBT2090-1                                    | <i>tdk</i> - ΔBT2090-1                                |      |                                                                                               |
| ΔBT3193                                      | <i>tdk</i> - ΔBT3193                                  |      |                                                                                               |
| ΔBT1969                                      | <i>tdk</i> - ΔBT1969                                  |      |                                                                                               |
| ΔBT1820                                      | <i>tdk</i> - ΔBT1820                                  |      |                                                                                               |
| ΔBT1822                                      | <i>tdk</i> - ΔBT1822                                  |      |                                                                                               |
| ΔBT1820/1822                                 | <i>tdk</i> - ΔBT1820/1822                             |      |                                                                                               |
| Comp 1685-9                                  | <i>tdk</i> - ΔBT1686-9<br>::pNBU2-bla-tetQb::BT1685-9 |      | pNBU2-bla-tetQb chromosomally integrates at one of two tRNAs <sup>er</sup> sites in <i>Bt</i> |
| Comp 2090-1                                  | <i>tdk</i> - ΔBT2090-1<br>::pNBU2-bla-tetQb::BT2090-1 |      | pNBU2-bla-tetQb chromosomally integrates at one of two tRNAs <sup>er</sup> sites in <i>Bt</i> |
| Comp 4738                                    | <i>tdk</i> - ΔBT4738<br>::pNBU2-bla-tetQb::BT4738     |      | pNBU2-bla-tetQb chromosomally integrates at one of two tRNAs <sup>er</sup> sites in <i>Bt</i> |
| PBT3692::P Bfp2E3                            | <i>tdk</i> -<br>PBT3692::P Bfp2E3                     |      | Promoter replaces 100 bp sequence immediately upstream of BT3692                              |
| PBT3692::P Bfp5E4                            | <i>tdk</i> -<br>PBT3692::P Bfp5E4                     |      | Promoter replaces 100 bp sequence immediately upstream of BT3692                              |
| <i>Escherichia coli</i> S17-1<br><i>λpir</i> |                                                       |      | Shuttles plasmids to <i>Bacteroides</i>                                                       |
| <i>Escherichia coli</i><br>BW27343           | <i>pir</i> <sup>+</sup> derivative of<br>DH5α         |      | Transformation and maintenance of plasmids; CGSC strain #7924                                 |
| <b>Plasmids</b>                              |                                                       |      |                                                                                               |
| pExchange- <i>tdk</i>                        |                                                       | (6)  | Counters selectable suicide plasmid for gene deletions                                        |
| pExchange::ΔBT2955                           |                                                       |      | Deletion of BT2955                                                                            |
| pExchange::ΔBT4738                           |                                                       |      | Deletion of BT4738                                                                            |
| pExchange::ΔBT1575                           |                                                       |      | Deletion of BT1575                                                                            |
| pExchange::ΔBT4455-7                         |                                                       |      | Deletion of BT4455-7                                                                          |
| pExchange::ΔBT1450                           |                                                       |      | Deletion of BT1450                                                                            |
| pExchange::ΔBT1686-9                         |                                                       | (1)  | Deletion of BT1686-9                                                                          |
| pExchange::ΔBT1917                           |                                                       |      | Deletion of BT1917                                                                            |

|                           |  |     |                                                                                               |
|---------------------------|--|-----|-----------------------------------------------------------------------------------------------|
| pExchange::ΔBT2090-1      |  |     | Deletion of BT2090-1                                                                          |
| pExchange::ΔBT3193        |  |     | Deletion of BT3193                                                                            |
| pExchange::ΔBT1969        |  |     | Deletion of BT1969                                                                            |
| pExchange::ΔBT1820        |  |     | Deletion of BT1820                                                                            |
| pExchange::ΔBT1822        |  |     | Deletion of BT1822                                                                            |
| pNBU2-bla-tetQb           |  | (7) | pNBU2-bla-tetQb chromosomally integrates at one of two tRNA <sup>ser</sup> sites in <i>Bt</i> |
| pNBU2-bla-tetQb::BT1685-9 |  |     | BT1685-9 gene complementation                                                                 |
| pNBU2-bla-tetQb::BT2090-1 |  |     | BT2090-1 gene complementation                                                                 |
| pNBU2-bla-tetQb::BT4738   |  |     | BT4738 gene complementation                                                                   |
| pNTP201                   |  |     | Vector for integrating Golden Gate-compatible parts                                           |
| pNTP202                   |  |     | pExchange2, part A                                                                            |
| pNTP203                   |  |     | pExchange2, part B                                                                            |
| pNTP221                   |  |     | pExchange2 with PBT3692::PBT1431 for PBT3692 replacement                                      |
| pNTP224                   |  |     | pExchange2 with PBT3692::BfP3E1/RBS8 for PBT3692 replacement                                  |
| pNTP225                   |  |     | pExchange2 with PBT3692::BfP2E2/RBS8 for PBT3692 replacement                                  |
| pNTP226                   |  |     | pExchange2 with PBT3692::P_BfP2E3/RBS8 for PBT3692 replacement                                |
| pNTP227                   |  |     | pExchange2 with PBT3692::P_BfP5E4/RBS8 for PBT3692 replacement                                |
| pNTP228                   |  |     | pExchange2 with PBT3692::PBT1925 for PBT3692 replacement                                      |
| pNTP230                   |  |     | pExchange2 with PBT3692::PBT3110 for PBT3692 replacement                                      |
| pNTP231                   |  |     | pExchange2 with PBT3692::PBT3321 for PBT3692 replacement                                      |
| pNTP232                   |  |     | pExchange2 with PBT3692::PBT4618 for PBT3692 replacement                                      |

Ref.: Reference

**Table S8. Primers, promoters and ribosome binding site used in this study.**

| Name                       | Notes | Sequence (restriction sites underlined)                    |
|----------------------------|-------|------------------------------------------------------------|
| <b>Deletion constructs</b> |       |                                                            |
| BT1450 left F              |       | GCGTCTAGAG <u>CCC</u> CAGATGAACCACATTG                     |
| BT1450 left R              |       | TAATAAAATGGAAAATGGAAAGTTG                                  |
| BT1450 right F             |       | TTTCCATTTTCCATTTATTACATAGGCTGTTT<br>GTATTAATGTTATG         |
| BT1450 right R             |       | GCGG <u>T</u> CGACCATATTTTCAGACGGGCGTAAC                   |
| BT1917 left F              |       | GCGTCTAGAGCTTTATCACCAAGAACGG                               |
| BT1917 left R              |       | CATGATGCAATCCGTTTTTAGTA                                    |
| BT1917 right F             |       | TAAAAACGGATTGCATCATGTAAGTTATAG<br>GCGATTACCTATAA           |
| BT1917 right R             |       | GCGG <u>T</u> CGACCGGTCCAATAAGTAGGGTG                      |
| BT2090 left F              |       | GCGTCTAGAGACAATCAATGCCAGCGTAG                              |
| BT2090 left R              |       | TAAGTACGGAATTTAATCATTTTTTTC                                |
| BT2091 right F             |       | ATGATTAAATTCCGTACTIONTAGTCTGCCATAG<br>TTTATTTAAAATTTAAAAC  |
| BT2091 right R             |       | GCGG <u>T</u> CGACGGAGTGTTTCGTCACAGC                       |
| BT3193 left F              |       | GCGTCTAGACCTGTAACGAATCAATGACTT<br>G                        |
| BT3193 left R              |       | TAAGGCATGAAACGTCTGTC                                       |
| BT3193 right F             |       | GACAGACGTTTCATGCCTTACATAAATAGTA<br>TAATTTTCGCGTTAAATG      |
| BT3193 right R             |       | GCGG <u>T</u> CGACCTTGAGTTCAGGCATTATTCT<br>G               |
| BT4738 left F              |       | GCGTCTAGACTTTGAATACCTCCGCAGC                               |
| BT4738 left R              |       | TAATCTATTACTCTATATGATGATAAACG                              |
| BT4738 right F             |       | TCATATAGAGTAATAGATTACATAAAATGA<br>TAAAATTAGAGGTTGTAG       |
| BT4738 right R             |       | GCGG <u>T</u> CGACGTACTIONCACGCTTCTTTCCAG                  |
| BT1575 left F              |       | GCGTCTAGACTTGCCCCTAACTGCAAAC                               |
| BT1575 left R              |       | CATAATATTTTCTGTTTTTATTCTTATTAATA<br>AACG                   |
| BT1575 right F             |       | TAAAAACAGAAAATATTATGTAGAACCCTT<br>ACCTGACTTCCC             |
| BT1575 right R             |       | GCGG <u>T</u> CGACCAATAAGATATGTGAGTCCTT<br>CAATG           |
| BT1820 left F              |       | GCGTCTAGAGTCTGCTGATGCTTGAATAG                              |
| BT1820 left R              |       | CATATTTCTAATAGGTTTAGGATTGATTCTT<br>AAT                     |
| BT1820 right F             |       | CTAAACCTATTAGAAATATGTAAAAGAGTT<br>CTTTGAAATATTTGAAATTTAGTT |
| BT1820 right R             |       | GCGG <u>T</u> CGACCTCTGACAACAAAGTAGGCTT<br>C               |
| BT1822 left F              |       | GCGTCTAGAGCATAACATTATATGATGTGGA<br>AACAC                   |
| BT1822 left R              |       | CATTAGTGTCCCATTTAAAATTGGGA                                 |

|                                  |                                                   |                                                         |
|----------------------------------|---------------------------------------------------|---------------------------------------------------------|
| BT1822 right outer F             | Outer PCR used as template for BT1822 right flank | GCAATCCGGAAGAAGTACTGA                                   |
| BT1822 right outer R             | Outer PCR used as template for BT1822 right flank | GGAATATGTTGACGTCCCTAAGG                                 |
| BT1822 right F                   |                                                   | ATTTTAATGGGACACTAATGTGACAGTTCCT<br>TCTTCAACGA           |
| BT1822 right R                   |                                                   | GCGGTCGACGTTTTGTCGGCTGAGGGT                             |
| BT2955 left F                    |                                                   | GCGTCTAGACCCAGATAATCAATTCCTTTTC<br>CG                   |
| BT2955 left R                    |                                                   | TAAATCATATTCACTCTAAAAATCTTATATC<br>ATGA                 |
| BT2955 right F                   |                                                   | TTTAGAGTGAATATGATTTACTCGTAATTCT<br>TCATTTTTTGTATTGTT    |
| BT2955 right R                   |                                                   | GCGGTCGACCCATTGTTTCTCTTGATAACG<br>GT                    |
| BT1969 left F                    |                                                   | GCGTCTAGACCATGCTATGTACTTCCCGATA                         |
| BT1969 left R                    |                                                   | GGTTATTTTAGCCATGGTATTGGTA                               |
| BT1969 right F                   |                                                   | ATACCATGGCTAAAATAACCTGAGAAGGCC<br>GTTATCAAAATC          |
| BT1969 right R                   |                                                   | GCGGTCGACCGTTTGACTTACCACGTGG                            |
| BT4455-57 left F                 |                                                   | GCGTCTAGACCGCAATGCTATAAAGTAGAA<br>GTG                   |
| BT4455-57 left R                 |                                                   | CATAATTATATTACGTAAAATTTAGATGCAT<br>CCT                  |
| BT4455-57 right F                |                                                   | TTTTACGTAATATAATTATGGTCATATTGAC<br>GTAACTCCGC           |
| BT4455-57 right R                |                                                   | GCGGTCGACGACCTTTATCGGACAGGAGAC                          |
| <b>Complementations</b>          |                                                   |                                                         |
| BT1685-9 F                       |                                                   | GCGTCTAGAGCTTTATTCCCAATAATTTAAA<br>TGCA                 |
| BT1685-9 R                       |                                                   | GCGGTCGACGAGAAGATAACATAATGATAA<br>GTGCG                 |
| BT2090-1 F                       |                                                   | GCGTCTAGAGCTTTAAGTTGCATGGAGATTC<br>T                    |
| BT2090-1 R                       |                                                   | GCGGTCGACCATCCCGCCTTCAGCC                               |
| BT4738 F                         |                                                   | GCGTCTAGACTAATCTTTTCCTAAGGATAGC<br>AATT                 |
| BT4738 R                         |                                                   | GCGGTCGACATAGAGTAATAGATTACATAC<br>GTTTCGTG              |
| <b>Golden Gate flank primers</b> |                                                   |                                                         |
| PBT3692 GG left-F                |                                                   | GCGGGTCTCCGTTCTGTAGCTTGTCGGACAA<br>GTG                  |
| PBT3692 GG left-R                |                                                   | GCGGGTCTCGTAGATATTCTCCAAGTCTAAA<br>ATATTATAATATTTAACACT |
| PBT3692 GG right-F               |                                                   | GCGGGTCTCCATGCTTAATTTAATCAACCAA<br>ATCGTG               |
| PBT3692 GG right-R               |                                                   | GCGGGTCTCGCACTTTCTTACCATACTCGGG<br>AGC                  |
| <b>qPCR primers</b>              |                                                   |                                                         |
| BT0899 qPCR-F                    | <i>gyrA</i> as reference gene                     | CCATGCGTTATACGGAGGCT                                    |
| BT0899 qPCR-R                    | <i>gyrA</i> as reference gene                     | TCACCTTCGGCTCTGTCAAC                                    |
| BT3692 qPCR-F                    |                                                   | CCGCAACACAACAGGCAA                                      |
| BT3692 qPCR-R                    |                                                   | ACACAAGTGATGCCCGGA                                      |
| BT3693 qPCR-F                    |                                                   | ATGCCGGTGCAGTAACATTC                                    |



|                                                   |                                                                     |                                                                                                                                                                                                                                  |
|---------------------------------------------------|---------------------------------------------------------------------|----------------------------------------------------------------------------------------------------------------------------------------------------------------------------------------------------------------------------------|
| BT3693 qPCR-R                                     |                                                                     | TGATACGCCGGAAATACCCA                                                                                                                                                                                                             |
| <b>Promoters and Ribosome Binding Sites (RBS)</b> |                                                                     |                                                                                                                                                                                                                                  |
| PBT3692                                           | Native promoter sequence; replaced by other promoters in this study | AAATTAGCCGGAATTGTAATGTGGATATTG<br>CAAATTGAGTACTTTTGCAGCGCAAATTAC<br>AAATCGTAACAAGGTTTATAATATTATTCAA<br>ATATATCT                                                                                                                  |
| P BfP3E1                                          | Promoter from pWW3852, (8)                                          | GATAAAACGAAAGGCTCAGTCGAAAGACTG<br>GGCCTTTCGTTTTACAATTGGGCTACCTTTTT<br>TTTGTAATAAAAAAACCCCGCCCCTGACAGG<br>GCGGGGTTTTTTTTTTCACTTGAACCTTCAA<br>ATAATGTTCTTATAAAACCAGTGTCGAAAG<br>AAACAAAGTAG                                        |
| P BfP2E2                                          | Promoter from pWW3853, (8)                                          | GATAAAACGAAAGGCTCAGTCGAAAGACTG<br>GGCCTTTCGTTTTACAATTGGGCTACCTTTTT<br>TTTGTAATAAAAAAACCCCGCCCCTGACAGG<br>GCGGGGTTTTTTTTTTCACTTGAACCTTCAA<br>ATAATGTTCTTATATATGCAGTGTCGAAAGA<br>AACAAAGTAG                                        |
| P BfP2E3                                          | Promoter from pWW3818, (8)                                          | GATAAAACGAAAGGCTCAGTCGAAAGACTG<br>GGCCTTTCGTTTTACAATTGGGCTACCTTTTT<br>TTGTTTTGTTTGCAATGGTTAATCTATTGTT<br>AAAATTTAAAGTTTCACTTGAACCTTCAAAT<br>AATGTTCTTATATGTGCAGTGTCGAAAGAA<br>ACAAAGTAG                                          |
| P BfP5E4                                          | Promoter from pWW3821, (8)                                          | GATAAAACGAAAGGCTCAGTCGAAAGACTG<br>GGCCTTTCGTTTTACAATTGGGCTACCTTTTT<br>TTGTTTTGTTTGCAATGGTTAATCTATTGTT<br>AAAATTTAAAGTTTCACTTGAACCTTCAAAT<br>AATGTTCTTCTATTTGCAGTGTCGAAAGAAA<br>CAAAGTAG                                          |
| RBS8                                              | RBS used with Whitaker <i>et al.</i> 2017 synthetic promoters, (8)  | GATCGTCCATCAATTTAAAATTTAAAAT                                                                                                                                                                                                     |
| PBT1431                                           | Promoter from <i>Bt</i>                                             | GCCAATTCATGTATTTTGCAAAAAATATCAT<br>GTACATTTGTGTTTCAAAAAACAGCAAAAC<br>GC                                                                                                                                                          |
| PBT1925                                           | Promoter from <i>Bt</i>                                             | GGGGTATTAGTATTGGGGAGCTTGCTCTCAA<br>ATAAAAGGTTACAGAATTGACGGTAGTGCG<br>CCTCTGCCGGAATTTGAGGGTAAAATGGTTT<br>AC                                                                                                                       |
| PBT3110                                           | Promoter from <i>Bt</i>                                             | GACCAAATTAATAAATTGGAGGGTGACTGT<br>TTTACAACCACCATCCTTTGCTGGTTATTGT<br>TCTAAGTTAGTAATTTTATTCACCTTTACTTT<br>TGCGTTTCAATTGTAAGCATCTTTTTTTTC<br>ATAACTTTGTCCTCTGTATCCTTATTGTCTTT<br>TTCTGTCCGGAATATAACTTAATGATCCGGGA<br>TACTTCATAACAT |
| PBT3321                                           | Promoter from <i>Bt</i>                                             | AGTCGCAAAGATAAGATTTTTATTACATTTG<br>CAGTGCACATTAACCTTTCTGTTAAC                                                                                                                                                                    |
| PBT4618                                           | Promoter from <i>Bt</i>                                             | TAGAGGTGTTTCAGTAAAGAATGTGTTAGTC<br>CAAACAGTCGTTTATCCCCATTTATTATGT<br>TGCCCAATAAATTTTCGTATTAATGAAACTT<br>AAATCTGTCAAGTGGTAAATGAGCGGTTGAT<br>TGGTGGCGGTCAAGCACCTATTTAGCACCTA<br>TAAGCATCCCTATACTTTTGCGGCATAAATT<br>TTAATACGAAGAAAA |

## References

1. Kovatcheva-Datchary P, Nilsson A, Akrami R, Lee YS, De Vadder F, Arora T, Hallen A, Martens E, Björck I, Bäckhed F. 2015. Dietary fiber-induced improvement in glucose metabolism is associated with increased abundance of *Prevotella*. *Cell Metab* 22:971–982.
2. Khademian M, Imlay JA. 2020. Do reactive oxygen species or does oxygen itself confer obligate anaerobiosis? The case of *Bacteroides thetaiotaomicron*. *Mol Microbiol* 1–15.
3. Lu Z, Sethu R, Imlay JA. 2018. Endogenous superoxide is a key effector of the oxygen sensitivity of a model obligate anaerobe. *Proc Natl Acad Sci U S A* 115:E3266–E3275.
4. Lu Z, Imlay JA. 2017. The fumarate reductase of *Bacteroides thetaiotaomicron*, unlike that of *Escherichia coli*, is configured so that it does not generate reactive oxygen species. *MBio* 8:1–11.
5. Ryan D, Jenniches L, Reichardt S, Barquist L, Westermann AJ. 2020. A high-resolution transcriptome map identifies small RNA regulation of metabolism in the gut microbe *Bacteroides thetaiotaomicron*. *Nat Commun* 11.
6. Bogachev A V., Bertsova Y V., Bloch DA, Verkhovsky MI. 2012. Urocanate reductase: Identification of a novel anaerobic respiratory pathway in *Shewanella oneidensis* MR-1. *Mol Microbiol* 86:1452–1463.
7. Martens EC, Chiang HC, Gordon JI. 2008. Mucosal glycan foraging enhances fitness and transmission of a saccharolytic human gut bacterial symbiont. *Cell Host Microbe* 4:447–57.
8. Whitaker WR, Shepherd ES, Sonnenburg JL. 2017. Tunable expression tools enable single-cell strain distinction in the gut microbiome. *Cell* 169:538-546.e12.
